# Supplementary material for: Membrane-Derived Phospholipids Control Synaptic Neurotransmission and Plasticity
Source: PLoS Biol. 2015 May 21;13(5):e1002153. doi: 10.1371/journal.pbio.1002153 (PMC4440815; doi:10.1371/journal.pbio.1002153)
Supplement: S1 Data — (XLSX) [file pbio.1002153.s001.xlsx]

## Sheet: Figure 1A
Expression levels of mRNA for indicated LPA receptors
	Replicate	lpa1	lpa2	lpa3	lpa4	lpa5	lpa6
	1	0.6075	0.6562	0.2245	0.6632	0.2453
	2	0.9261	0.4706	0.4243	0.6374	0.3313
	3	1.4655	0.5305	0.5961	0.6408	0.4815
	4	0.7621	0.5538	0.2801	0.6559	0.3862	0.0640737
	5	0.8519	0.3928	0.411	0.6693	0.3772	0.0984732
	6	1.4492	0.4582	0.5246	0.657	0.4169	0.0751478
	mean	1.01038	0.51035	0.4101	0.653933	0.373067	0.0792316
	std deviation	0.36218	0.0913059	0.140894	0.0124989	0.0799218	0.0175596
	SEM	0.147859	0.0372755	0.0575199	0.00510266	0.0326279	0.010138

## Sheet: Figure 2B
Vehicle effect on eEPSCs amplitude (%)				Effects on eEPSCs (%). Vehicle effect subtracted				Vehicle effect on eIPSC amplitude (%)				Effects on eIPSCs (%). Vehicle effect subtracted
AMPAergic eEPSCs								GABAAergic eIPSCs
					LPA	s-LPA			HMN#1	-7.05414			LPA	s-LPA
	HMN#1	-6.03369			45.1202	89.8221			HMN#2	-5.34293			38.7663	62.6702
	HMN#2	-2.93244			41.8	80.3596			HMN#3	-6.74232			49.7138	55.4881
	HMN#3	-2.56289			42.2988	46.6113			HMN#4	-6.2063			48.7988	28.0235
	HMN#4	-4.2925			43.4929	38.1202			HMN#5	-5.68716			32.9605	27.0038
	HMN#5	-5.71859			56.1418	21.2461			HMN#6	-6.80529
					58.176	35.432
	mean	-4.30802			63.7646	28.2057			mean	-6.30636
	std deviation	1.57366			78.3721	67.9175			std deviation	0.681145
	SEM	0.703761			64.1025	69.0091			SEM	0.278076
					63.3327	75.7114
					49.1029	37.7025
					61.3138
					67.8106
				mean	56.5253	53.6489						mean	42.5599	43.2964
				std deviation	11.4048	23.4997						std deviation	8.09616	18.4634
				SEM	3.16313	7.08542						SEM	4.04808	9.23171
				Amplitude reduction (%)	43.4747	46.3511						Amplitude reduction (%)	57.4401	56.7036
				SEM	3.16313	7.08542						SEM	4.04808	7.08542

## Sheet: Figure 2C
	Dose-dependent LPA effects on ePSCs (%). Vehicle effect subtracted																Nonlinear regression
																	Equation: Standard Curves; Five Parameter Logistic - 2 Slopes
AMPAergic eEPSCs																	AvSlope=2*abs(Slope)*SlopeCon/(1+SlopeCon)
		1 nM	10 nM	100 nM	1 mM	2,5 mM	10 mM	20 mM									fx=1/(1 + (x/EC50)^AvSlope)
		100.945	96.4504	88.818	70.2683	45.1202	26.9583	29.6276									f1 = min + (max-min)/(1 + fx*(x/EC50)^(-Slope) + (1-fx)*(x/EC50)^(-Slope*SlopeCon))
		102.264	96.7924	91.5415	73.3157	41.8	38.11	37.5729		Five Parameter Logistic - 2 Slopes							f=if(x<=0; if(Slope > 0; min; max); f1)
		100.555	97.523	89.7647	81.3784	42.2988	31.2841	35.2553
		99.3431	95.4474	88.7908	75.3796	43.4929	42.7683	42.3241		R	R2		min	0.332443
				85.1366	86.4491	56.1418	30.3134	28.0304		0.9998	0.9997		max	1.01291
						58.176	37.5124	30.7183					EC50	1786,6848 nM
						63.7646	41.654	30.1869					Slope	-0.4991
						78.3721	29.2829	34.4424					SlopeCon	5.4299
						64.1025	32.374	32.548
						63.3327	29.3042
						49.1029	35.1703
						61.3138	33.0676
						67.8106
	mean	100.777	96.5533	88.8103	77.3582	56.5253	33.9833	33.4118
	std deviation	1.20338	0.862399	2.3381	6.50633	11.4048	5.08499	4.51228
	SEM	0.601688	0.4312	1.04563	2.90972	3.16313	1.46791	1.50409
GABAAergic eIPSCs
		1 nM	10 nM	100 nM	1 mM	2,5 mM	10 mM	20 mM		Five Parameter Logistic - 2 Slopes
		95.2885	89.9369	82.2709	69.2936	38.7663	38.0815	36.4791
		98.6009	91.1026	82.1373	67.0215	49.7138	36.1372	34.1273		R	R2		min	0.325232
		96.6535	85.0093	79.6592	71.5937	48.7988	30.9368	31.4592		0.9984	0.9967		max	1.02211
		95.7682	88.8584	78.6686	68.1217	32.9605	31.4989	28.3034					EC50	1000,0489 nM
				82.0089			29.2882	36.307					Slope	-0.3054
				78.2853			36.7989	35.0761					SlopeCon	8.589
							35.8043	38.0297
							39.1895	36.3748
							35.3972
	mean	96.5778	88.7268	80.505	69.0076	42.5599	34.7925	34.5196
	std deviation	1.46246	2.64231	1.84712	1.95781	8.09616	3.41662	3.19078
	SEM	0.731232	1.32115	0.754082	0.978903	4.04808	1.13887	1.12811

## Sheet: Figure 3B
sEPSCs amplitude (pA)
		Before	LPA	washing
	HMN#1	33.4251	29.7129	35.7924
	HMN#2	33.3655	23.5523	32.8294
	HMN#3	51.2419	22.5598	52.8583
	HMN#4	30.1044	20.2816	28.6892
	mean	37.0342	24.0267	37.5423
	std deviation	9.598	4.03052	10.6181
	SEM	4.799	2.01526	5.30903

## Sheet: Figure 3C
Cumulative probability curves
spontaneous EPSCs
	Amplitude (pA)	Before	LPA	Washing
	0	0	0	0
	2	0	0	0
	4	0	0	0
	6	0	0	0
	8	0	0	0
	10	0.00236176	0.00275536	0.00320446
	12	0.0025586	0.0092501	0.0054076
	14	0.0080693	0.0337	0.0194
	16	0.0183	0.0921	0.0401
	18	0.038	0.1817	0.0725
	20	0.0844	0.3222	0.1316
	22	0.1315	0.4253	0.1825
	24	0.1822	0.5241	0.2417
	26	0.2438	0.6184	0.296
	28	0.3257	0.7134	0.3589
	30	0.3763	0.7758	0.3946
	32	0.4255	0.8207	0.4354
	34	0.4696	0.8585	0.4679
	36	0.5241	0.8916	0.5105
	38	0.5641	0.9132	0.546
	40	0.5954	0.927	0.5776
	42	0.6345	0.9412	0.6173
	44	0.669	0.9498	0.6503
	46	0.6987	0.9573	0.6792
	48	0.7209	0.963	0.7106
	50	0.7483	0.9705	0.742
	52	0.7668	0.9744	0.7643
	54	0.7843	0.9782	0.7869
	56	0.8081	0.9815	0.8121
	58	0.8207	0.9837	0.8312
	60	0.8319	0.9856	0.845
	62	0.8453	0.9868	0.8596
	64	0.8573	0.9888	0.8738
	66	0.8695	0.9898	0.889
	68	0.8807	0.9904	0.9021
	70	0.89	0.9909	0.9107
	72	0.8998	0.9919	0.9197
	74	0.9073	0.9929	0.9255
	76	0.9134	0.9933	0.9311
	78	0.9215	0.9945	0.9379
	80	0.9272	0.9947	0.9431
	82	0.9335	0.9949	0.9487
	84	0.937	0.9953	0.9517
	86	0.9423	0.9953	0.9561
	88	0.9471	0.9957	0.9605
	90	0.9512	0.9961	0.9637
	92	0.9559	0.9963	0.9676
	94	0.9577	0.9965	0.9686
	96	0.961	0.9967	0.971
	98	0.9628	0.9969	0.972
	100	0.9654	0.9969	0.9738
	102	0.9673	0.9972	0.9752
	104	0.9699	0.9976	0.9776
	106	0.9722	0.998	0.9794
	108	0.9748	0.9982	0.9812
	110	0.9766	0.9982	0.9828
	112	0.9787	0.9982	0.9846
	114	0.9803	0.9982	0.9854
	116	0.9821	0.9982	0.9866
	118	0.9829	0.9982	0.9876
	120	0.9839	0.9982	0.9882
	122	0.9845	0.9988	0.9886
	124	0.9858	0.9988	0.9896
	126	0.9864	0.9988	0.99
	128	0.9872	0.9988	0.9906
	130	0.988	0.9988	0.9914
	132	0.9886	0.9992	0.9916
	134	0.9888	0.9992	0.9918
	136	0.9896	0.9994	0.9926
	138	0.9902	0.9996	0.9928
	140	0.9907	0.9998	0.9936
	142	0.9921	0.9998	0.9946
	144	0.9927	0.9998	0.995
	146	0.9929	0.9998	0.995
	148	0.9933	0.9998	0.9952
	150	0.9935	1	0.9954
	152	0.9937	1	0.9956
	154	0.9943	1	0.996
	156	0.9945	1	0.9962
	158	0.9953	1	0.9964
	160	0.9955	1	0.9964
	162	0.9957	1	0.9966
	164	0.9961	1	0.9966
	166	0.9965	1	0.9968
	168	0.9967	1	0.9968
	170	0.9967	1	0.9968
	172	0.9967	1	0.997
	174	0.9967	1	0.997
	176	0.9967	1	0.997
	178	0.9969	1	0.9972
	180	0.9969	1	0.9974
	182	0.997	1	0.9974
	184	0.997	1	0.9974
	186	0.9972	1	0.9974
	188	0.9972	1	0.9974
	190	0.9974	1	0.9976
	192	0.9974	1	0.9976
	194	0.9974	1	0.9976
	196	0.9974	1	0.9976
	198	0.9974	1	0.9976
	200	0.9974	1	0.9976
	202	0.9978	1	0.998
	204	0.9978	1	0.998
	206	0.9978	1	0.998
	208	0.998	1	0.9982
	210	0.9984	1	0.9986
	212	0.9984	1	0.9986
	214	0.9986	1	0.9988
	216	0.9986	1	0.9988
	218	0.9986	1	0.9988
	220	0.9986	1	0.9988
	222	0.9986	1	0.9988
	224	0.9988	1	0.999
	226	0.9988	1	0.999
	228	0.9988	1	0.999
	230	0.9988	1	0.999
	232	0.9988	1	0.999
	234	0.9988	1	0.999
	236	0.9988	1	0.999
	238	0.9988	1	0.999
	240	0.999	1	0.9992
	242	0.999	1	0.9992
	244	0.999	1	0.9992
	246	0.999	1	0.9992
	248	0.999	1	0.9992
	250	0.999	1	0.9992
	252	0.9992	1	0.9994
	254	0.9992	1	0.9994
	256	0.9992	1	0.9994
	258	0.9992	1	0.9994
	260	0.9992	1	0.9994
	262	0.9992	1	0.9994
	264	0.9992	1	0.9994
	266	0.9992	1	0.9994
	268	0.9992	1	0.9994
	270	0.9992	1	0.9994
	272	0.9992	1	0.9994
	274	0.9992	1	0.9994
	276	0.9992	1	0.9994
	278	0.9992	1	0.9994
	280	0.9992	1	0.9994
	282	0.9992	1	0.9994
	284	0.9992	1	0.9994
	286	0.9992	1	0.9994
	288	0.9994	1	0.9996
	290	0.9994	1	0.9996
	292	0.9996	1	0.9998
	294	0.9996	1	0.9998
	296	0.9996	1	0.9998
	298	0.9996	1	0.9998
	300	0.9996	1	0.9998
	302	0.9998	1	0.9998
	304	0.9998	1	0.9998
	306	0.9998	1	0.9998
	308	0.9998	1	0.9998
	310	0.9998	1	0.9998
	312	0.9998	1	0.9998
	314	0.9998	1	0.9998
	316	0.9998	1	0.9998
	318	0.9998	1	0.9998
	320	0.9998	1	0.9998
	322	0.9998	1	0.9998
	324	0.9998	1	0.9998
	326	0.9998	1	0.9998
	328	0.9998	1	0.9998
	330	0.9998	1	0.9998
	332	0.9998	1	0.9998
	334	0.9998	1	0.9998
	336	0.9998	1	0.9998
	338	0.9998	1	0.9998
	340	0.9998	1	0.9998
	342	0.9998	1	0.9998
	344	0.9998	1	0.9998
	346	1	1	1

## Sheet: Figure 3D
EPSC2/EPSC1
	Before
	interval (ms)	25	50	75	100	125	150	175	200
	HMN#1	1.62838	1.42191	1.31916	1.18804	1.14194	1.10133	1.13217	1.05056
	HMN#2	1.78716	1.66702	1.49335	1.40964	1.30104	1.24318	1.15826	1.13421
	HMN#3	1.95631	1.68656	1.55691	1.48767	1.43275	1.40735	1.38354	1.38223
	HMN#4	1.77665	1.59418	1.48084	1.37584	1.32028	1.25406	1.23685	1.1995
	mean	1.78712	1.59242	1.46257	1.3653	1.299	1.25148	1.22771	1.19162
	std deviation	0.134082	0.12042	0.101236	0.127114	0.119744	0.125055	0.113015	0.140934
	SEM	0.0670408	0.0602101	0.0506182	0.0635571	0.0598718	0.0625277	0.0565074	0.0704672
	LPA
	HMN#1	1.81227	1.60492	1.48795	1.34229	1.26717	1.19619	1.17189	1.12367
	HMN#2	1.9135	1.6939	1.54068	1.38216	1.31993	1.31979	1.24632	1.22117
	HMN#3	2.44828	1.99628	1.75362	1.58631	1.45455	1.39936	1.34326	1.29421
	HMN#4	1.89965	1.712	1.56544	1.43632	1.3515	1.2415	1.21474	1.20094
	mean	2.01842	1.75177	1.58692	1.43677	1.34829	1.28921	1.24405	1.21
	std deviation	0.29005	0.169587	0.115737	0.106884	0.0789185	0.089434	0.0728299	0.070123
	SEM	0.145025	0.0847937	0.0578685	0.053442	0.0394593	0.044717	0.036415	0.0350615
	Washing
	HMN#1	1.63402	1.44326	1.33229	1.22571	1.18028	1.13278	1.20364	1.10144
	HMN#2	1.81399	1.66679	1.51501	1.42238	1.29006	1.22835	1.15677	1.1223
	HMN#3	2.1236	1.78918	1.65306	1.52269	1.44063	1.39535	1.3011	1.27848
	HMN#4	1.78716	1.69702	1.49335	1.40964	1.30104	1.24318	1.18826	1.16421
	mean	1.83969	1.64906	1.49843	1.39511	1.303	1.24992	1.21244	1.16661
	std deviation	0.2052	0.146745	0.131419	0.123733	0.10673	0.108601	0.0622398	0.0790188
	SEM	0.1026	0.0733726	0.0657096	0.0618665	0.0533651	0.0543006	0.0311199	0.0395094

## Sheet: Figure 3E
Minimal stimulation paradigm
	Mean amplitude (pA)					Failure probability (%)
		Before	LPA	washing		Before	LPA	washing
	HMN#1	37.5547	19.8814	37.2597		38.5	83	40
	HMN#2	37.4382	19.4266	37.719		32	77.5	35
	HMN#3	37.7385	19.7792	37.8348		33.5	79.5	36.5
	HMN#4	37.8913	17.107	37.7458		38.5	78.5	38
	mean	37.6557	19.0486	37.6398		35.625	79.625	37.375
	std deviation	0.199877	1.30896	0.258197		3.37577	2.39357	2.136
	SEM	0.0999385	0.654478	0.129099		1.68789	1.19678	1.068

## Sheet: Figure 4C
Reduction in eEPSCs amplitude (%)
			LPA						s-LPA
		Control	vehicle	cRNA	siRNAlpa1			Control	vehicle	cRNA	siRNAlpa1
		59.1798	49.0976	50.8729	12.1019			68.8679	49.5562	49.1547	15.3028
		62.5	48.3296	48.4776	17.0276			76.0942	48.2388	47.6948	11.6833
		62.0012	48.9888	44.3464	7.4022			36.3823	49.0452	47.926	17.2277
		60.8071	49.7691	53.8753	13.3535			35.2907	50.0436	50.5612	17.7611
		48.1582	49.7129	52.5148	10.9201			28.5883			17.5247
		46.124	50.9658	52.817	10.4598			66.5974
		40.5354			12.0661
		25.9279			10.5974
		40.1975			10.5027
		40.9673
		55.1971
		42.9862
		36.4894
	mean	47.7747	49.4773	50.484	11.6035		mean	51.9701	49.2209	48.8342	15.8999
	std deviation	11.4048	0.9007	3.54725	2.61237		std deviation	20.7334	0.771287	1.31761	2.54967
	SEM	3.16313	0.367709	1.44816	0.87079		SEM	8.46436	0.385644	0.658803	1.14025
		100	54.8798
		100	58.2
		100	57.7012
		100	56.5071
		100	43.8582
		100	41.824
		100	36.2354
		100	21.6279
		100	35.8975
		#REF!	36.6673
		#REF!	50.8971
		100	38.6862
		100	32.1894

## Sheet: Figure 4D
Increase in PPR (%)
			LPA						s-LPA
		Control	vehicle	cRNA	siRNAlpa1			Control	vehicle	cRNA	siRNAlpa1
		18.7012	29.1997	26.6743	6.1403			24.7156	27.2226	35.4691	11.3325
		19.2452	27.4643	28.4934	9.65961			46.4323	24.8719	33.1454	5.44635
		15.5459	30.12	28.7306	11.4999			35.2637	41.7167	32.1975	6.26305
		10.2444	30.5741	44.5433	10.1812			22.8542	33.3503	32.5067	6.51884
		65.5615	31.3042	29.0216	6.81542			26.577			8.33077
		41.4691	30.4269	28.9861	7.22802			37.1251
		25.0282			13.2612
		32.7218			5.60449
		44.4483			11.1313
		32.0832
		42.8652
		31.9151
		28.3179
		22.0688
		50.3214
		27.2374
		32.6822
	mean	31.7916	29.8482	31.0749	9.05793		mean	32.1613	31.7904	33.3297	7.57831
	std deviation	13.9015	1.35345	6.65584	2.70114		std deviation	9.06829	7.52096	1.47988	2.34829
	SEM	3.37162	0.552543	2.71724	0.90038		SEM	3.70211	3.76048	0.739938	1.05019

## Sheet: Figure 4G
Effects on eEPSCs amplitude (%)
			PTX						bPTX
		Before	LPA	Washing				Before	LPA	Washing
	HMN#1	124.606	121.292	126.187			HMN#1	88.8889	47.4672	91.7657
	HMN#2	128.25	131.138	128.486			HMN#2	66.4999	26.4332	72.2118
	HMN#3	107.602	108.11	109.939			HMN#3	84.1359	33.6043	75.985
	HMN#4	88.9011	90.4627	90.8732			HMN#4	124.599	56.9314	127.413
	HMN#5	66.5074	69.229	71.5253			HMN#5	128.247	66.6875	129.748
	HMN#6	84.1336	76.4793	75.2461			HMN#6	107.609	43.8816	111.007
	mean	100	99.4519	100.376			mean	99.9965	45.8342	101.355
	std deviation	24.3227	24.8112	24.9079			std deviation	24.3239	14.7679	25.1525
	SEM	9.92971	10.1291	10.1686			SEM	9.93019	6.02898	10.2685
		Before	U73122	Washing				Before	LPA	LPA+U73122	Washing
	HMN#1	163.986	152.708	148.131			HMN#1	68.5092	34.6701	67.2733	69.6599
	HMN#2	107.713	92.2548	91.8395			HMN#2	100.089	51.0569	100.878	97.9799
	HMN#3	71.9678	71.1323	67.0148			HMN#3	108.741	56.0859	107.974	107.122
	HMN#4	56.333	53.7073	57.2547			HMN#4	92.1625	44.8133	90.7987	89.8611
							HMN#5	130.498	67.252	134.93	133.779
	mean	100	92.4505	91.0599			mean	100	50.7757	100.371	99.6804
	std deviation	47.7715	43.1527	40.7375			std deviation	22.6916	12.1931	24.6956	23.5513
	SEM	23.8857	21.5764	20.3688			SEM	10.148	5.45291	11.0442	10.5325
		Before	U73343	Washing				Before	LPA	LPA+U73343	Washing
	HMN#1	156.024	156.955	138.801			HMN#1	114.207	63.7938	59.3425	117.13
	HMN#2	40.7722	34.7481	33.8992			HMN#2	87.6596	45.184	46.4979	83.3423
	HMN#3	72.1522	75.1643	69.77			HMN#3	186.555	106.377	102.998	168.052
	HMN#4	131.051	127.026	120.838			HMN#4	68.8351	34.4042	36.4421	71.5703
							HMN#5	42.7438	25.5819	21.3451	43.8968
	mean	100	98.4734	90.8269			mean	100	55.0681	53.3251	96.7982
	std deviation	52.8719	54.282	47.9107			std deviation	54.9895	32.0267	31.0563	47.7141
	SEM	26.436	27.141	23.9553			SEM	24.592	14.3228	13.8888	21.3384

[truncated: 41 more sheets: Figure 4H, Figure 5B, Figure 5D, Figure 5F, Figure 5L, Figure 5N, Figure 6A, Fgure 6F, Figure 6G, Figure 6I, Figure 7A, Figure 7B, Figure 7G, Figure 8A, Figure 8B, Figure 9A, Figure 9L, Figure S1B, Figure S2, Figure S3 …]
